# Supplementary material for: Magnetically responsive colloidal crystals with angle-independent gradient structural colors in microfluidic droplet arrays
Source: Royal Society of Chemistry journal article supplement (doi:10.1039/c9nr04011k), 2019-01-01
Supplement: c9nr04011k1.pdf [file c9nr04011k1.pdf]

## Magnetically responsive colloidal crystals with angle-independent gradient structural colors in microfluidic droplet arrays

Junjie Chi,<sup>ab</sup> Changmin Shao,<sup>b</sup> Yalan Zhang,<sup>c</sup> Dong Ni,<sup>a</sup> Tiantian Kong<sup>\*a</sup> and Yuanjin Zhao<sup>\*b</sup>

a Guangdong Key Laboratory for Biomedical Measurements and Ultrasound Imaging, Department of Biomedical Engineering, Shenzhen University, Shenzhen 518060, China.

E-mail: [ttkong@szu.edu.cn](mailto:ttkong@szu.edu.cn)

b State Key Laboratory of Bioelectronics, School of Biological Science and Medical Engineering, Southeast University, Nanjing 210096, China.

E-mail: [yjzhao@seu.edu.cn](mailto:yjzhao@seu.edu.cn)

c Department of pharmaceutical engineering, School of engineering, China Pharmaceutical University, Nanjing 211198, China.

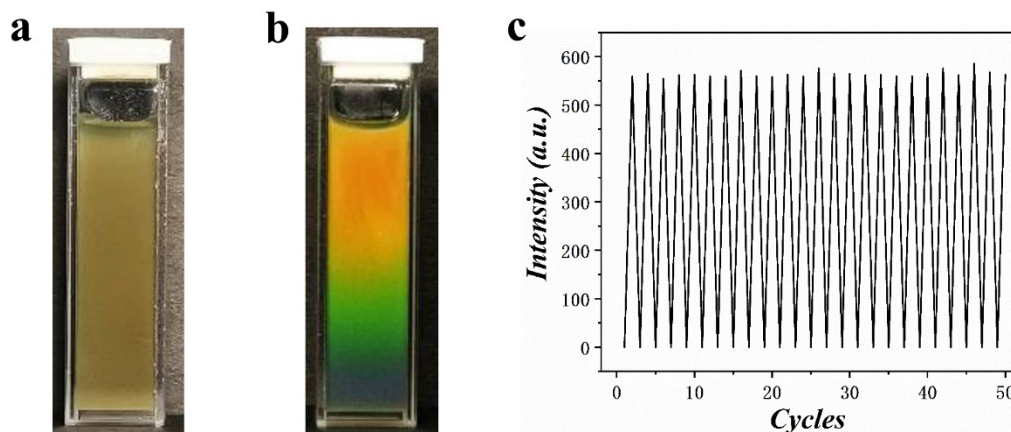

**Figure S1** a Photographs of the pre-gel solution containing well-dispersed  $\text{Fe}_3\text{O}_4@\text{SiO}_2$  colloidal nanoparticles. b Photographs of the composite pre-gel solution with an iridescent color subjected to a spatial magnetic field with remarkable variation in field strength and direction. c The reflection spectra variation of the pre-gel solution as a function of the cyclic application of an external magnetic field with the same field strength and direction.
